# Supplementary material for: Evaluation of the Neutralizing Antibodies Response against 14 SARS-CoV-2 Variants in BNT162b2 Vaccinated Naïve and COVID-19 Positive Healthcare Workers from a Northern Italian Hospital
Source: MDPI journal article supplement (doi:10.3390/vaccines10050703), 2022-04-29
Supplement: s1 [file vaccines-1678239-supplementary.pdf › vaccines-1678239-supplementary.pdf]

## Supplementary Materials

**Table S1.** Descriptive statistics of the data analysed in the study.

|                 |                    | Reference | Original | ALPHA | GAMMA | BETA  | B.1.258.17 | A.36.3 (1) | ETA   | DELTA  | MU    | C.36.3 (2) | LAMBDA | DELTA + | OMICRON |
|-----------------|--------------------|-----------|----------|-------|-------|-------|------------|------------|-------|--------|-------|------------|--------|---------|---------|
| convalescent-PD | Number of values   | 30        | 30       | 30    | 30    | 30    | 30         | 30         | 30    | 30     | 30    | 30         | 30     | 30      | 30      |
|                 | Minimum            | 20        | 5        | 5     | 5     | 5     | 5          | 5          | 5     | 5      | 5     | 5          | 5      | 5       | 5       |
|                 | Maximum            | 640       | 640      | 640   | 640   | 160   | 160        | 640        | 160   | 320    | 160   | 640        | 160    | 160     | 10      |
|                 | Range              | 620       | 635      | 635   | 635   | 155   | 155        | 635        | 155   | 315    | 155   | 635        | 155    | 155     | 5       |
|                 | Mean               | 384,7     | 172,3    | 397,5 | 151,7 | 35,67 | 33,5       | 62,67      | 42,83 | 51,5   | 27,83 | 61,83      | 18     | 43,17   | 5,5     |
|                 | Std. Deviation     | 244,1     | 186,3    | 249,2 | 196,4 | 46,75 | 40,81      | 119,1      | 55,83 | 65,8   | 38,9  | 128,2      | 29,14  | 51,55   | 1,526   |
|                 | Std. Error of Mean | 44,56     | 34,02    | 45,49 | 35,85 | 8,536 | 7,452      | 21,75      | 10,19 | 12,01  | 7,102 | 23,4       | 5,321  | 9,412   | 0,2785  |
|                 |                    |           |          |       |       |       |            |            |       |        |       |            |        |         |         |
| naive-HCW 2-1   | Number of values   | 30        | 30       | 30    | 30    | 30    | 30         | 30         | 30    | 30     | 30    | 30         | 30     | 30      | 30      |
|                 | Minimum            | 80        | 10       | 20    | 10    | 5     | 5          | 5          | 5     | 5      | 5     | 10         | 5      | 4       | 5       |
|                 | Maximum            | 640       | 640      | 640   | 320   | 80    | 80         | 640        | 40    | 40     | 40    | 160        | 40     | 40      | 5       |
|                 | Range              | 560       | 630      | 620   | 310   | 75    | 75         | 635        | 35    | 35     | 35    | 150        | 35     | 36      | 0       |
|                 | Mean               | 469,3     | 175      | 182,7 | 92,67 | 14,67 | 24         | 56,17      | 16,17 | 19,17  | 12,5  | 45,33      | 13,5   | 22,13   | 5       |
|                 | Std. Deviation     | 195,7     | 195,4    | 208,8 | 79    | 15,25 | 16,05      | 114,6      | 11,87 | 13,46  | 9,978 | 42,73      | 9,662  | 13,54   | 0       |
|                 | Std. Error of Mean | 35,72     | 35,68    | 38,13 | 14,42 | 2,785 | 2,93       | 20,92      | 2,167 | 2,457  | 1,822 | 7,801      | 1,764  | 2,473   | 0       |
|                 |                    |           |          |       |       |       |            |            |       |        |       |            |        |         |         |
| naive-HCW 2-6   | Number of values   | 28        | 28       | 28    | 28    | 28    | 28         | 28         | 28    | 28     | 28    | 28         | 28     | 28      | 28      |
|                 | Minimum            | 10        | 5        | 5     | 5     | 5     | 5          | 5          | 5     | 5      | 5     | 5          | 5      | 5       | 5       |
|                 | Maximum            | 320       | 40       | 56    | 40    | 20    | 40         | 40         | 120   | 20     | 20    | 40         | 10     | 20      | 5       |
|                 | Range              | 310       | 35       | 51    | 35    | 15    | 35         | 35         | 115   | 15     | 15    | 35         | 5      | 15      | 0       |
|                 | Mean               | 76,43     | 19,11    | 10,93 | 11,61 | 7,679 | 9,643      | 16,79      | 12,93 | 8,571  | 8,036 | 10,54      | 7,5    | 8,036   | 5       |
|                 | Std. Deviation     | 96,39     | 12,25    | 9,892 | 11,06 | 5,354 | 7,192      | 12,26      | 22,87 | 5,245  | 3,426 | 7,618      | 2,546  | 4,159   | 0       |
|                 | Std. Error of Mean | 18,22     | 2,315    | 1,869 | 2,09  | 1,012 | 1,359      | 2,318      | 4,322 | 0,9913 | 0,648 | 1,44       | 0,4811 | 0,7859  | 0       |
|                 |                    |           |          |       |       |       |            |            |       |        |       |            |        |         |         |
| naive-HCW 3-1   | Number of values   | 22        | 22       | 22    | 22    | 22    | 22         | 22         | 22    | 22     | 22    | 22         | 22     | 22      | 22      |
|                 | Minimum            | 320       | 40       | 80    | 20    | 5     | 40         | 40         | 10    | 20     | 10    | 40         | 40     | 20      | 5       |
|                 | Maximum            | 640       | 640      | 640   | 640   | 640   | 640        | 640        | 640   | 640    | 640   | 640        | 640    | 640     | 160     |
|                 | Range              | 320       | 600      | 560   | 620   | 635   | 600        | 600        | 630   | 620    | 630   | 600        | 600    | 620     | 155     |
|                 | Mean               | 523,6     | 481,8    | 498,2 | 246,4 | 207,5 | 323,6      | 390,9      | 158,6 | 397,3  | 162,3 | 318,2      | 220    | 360,9   | 44,77   |
|                 | Std. Deviation     | 157,6     | 205,3    | 200,5 | 230,7 | 220,5 | 215,6      | 226,3      | 164   | 222,6  | 201,9 | 225,4      | 217,3  | 245,2   | 50,01   |
|                 | Std. Error of Mean | 33,59     | 43,76    | 42,74 | 49,19 | 47,01 | 45,96      | 48,24      | 34,97 | 47,45  | 43,04 | 48,06      | 46,32  | 52,28   | 10,66   |
|                 |                    |           |          |       |       |       |            |            |       |        |       |            |        |         |         |
| exposed-HCW 2-1 | Number of values   | 16        | 16       | 16    | 16    | 16    | 16         | 16         | 16    | 16     | 16    | 16         | 16     | 16      | 16      |
|                 | Minimum            | 320       | 160      | 320   | 80    | 10    | 80         | 40         | 20    | 40     | 10    | 80         | 40     | 80      | 5       |
|                 | Maximum            | 640       | 640      | 640   | 640   | 640   | 640        | 640        | 640   | 640    | 640   | 640        | 320    | 640     | 160     |
|                 | Range              | 320       | 480      | 320   | 560   | 630   | 560        | 600        | 620   | 600    | 630   | 560        | 280    | 560     | 155     |
|                 | Mean               | 620       | 570      | 620   | 460   | 240,6 | 535        | 532,5      | 216,3 | 462,5  | 208,1 | 415        | 175    | 355     | 43,13   |
|                 | Std. Deviation     | 80        | 154,2    | 80    | 223,4 | 181,6 | 195,3      | 201,7      | 175,5 | 220    | 188,2 | 217,1      | 109,2  | 157,2   | 49,73   |
|                 | Std. Error of Mean | 20        | 38,56    | 20    | 55,86 | 45,39 | 48,84      | 50,43      | 43,86 | 55,01  | 47,04 | 54,27      | 27,29  | 39,31   | 12,43   |
|                 |                    |           |          |       |       |       |            |            |       |        |       |            |        |         |         |
| exposed-HCW 2-6 | Number of values   | 16        | 16       | 16    | 16    | 16    | 16         | 16         | 16    | 16     | 16    | 16         | 16     | 16      | 16      |
|                 | Minimum            | 80        | 40       | 40    | 40    | 10    | 20         | 40         | 20    | 20     | 10    | 10         | 10     | 10      | 5       |
|                 | Maximum            | 640       | 640      | 640   | 640   | 160   | 640        | 640        | 320   | 320    | 160   | 640        | 160    | 320     | 40      |
|                 | Range              | 560       | 600      | 600   | 600   | 150   | 620        | 600        | 300   | 300    | 150   | 630        | 150    | 310     | 35      |

|                 |                    |       |       |       |       |       |       |       |       |       |       |       |       |       |       |
|-----------------|--------------------|-------|-------|-------|-------|-------|-------|-------|-------|-------|-------|-------|-------|-------|-------|
|                 | Mean               | 470   | 220   | 157,5 | 162,5 | 67,5  | 196,3 | 457,5 | 92,5  | 127,5 | 54,38 | 183,1 | 81,88 | 96,25 | 15    |
|                 | Std. Deviation     | 212,4 | 158   | 157,6 | 166,2 | 58,71 | 187,4 | 249,6 | 80,62 | 92,34 | 53,79 | 165,2 | 64,31 | 79,66 | 13,66 |
|                 | Std. Error of Mean | 53,1  | 39,5  | 39,41 | 41,55 | 14,68 | 46,84 | 62,39 | 20,16 | 23,08 | 13,45 | 41,29 | 16,08 | 19,91 | 3,416 |
| exposed-HCW 3-1 | Number of values   | 10    | 10    | 10    | 10    | 10    | 10    | 10    | 10    | 10    | 10    | 10    | 10    | 10    | 10    |
|                 | Minimum            | 320   | 20    | 20    | 5     | 5     | 10    | 40    | 5     | 20    | 10    | 5     | 5     | 5     | 5     |
|                 | Maximum            | 640   | 640   | 640   | 320   | 160   | 640   | 640   | 160   | 640   | 160   | 640   | 160   | 640   | 80    |
|                 | Range              | 320   | 620   | 620   | 315   | 155   | 630   | 600   | 155   | 620   | 150   | 635   | 155   | 635   | 75    |
|                 | Mean               | 608   | 546   | 514   | 168,5 | 108,5 | 305   | 468   | 124,5 | 438   | 97    | 352,5 | 132,5 | 417,5 | 33    |
|                 | Std. Deviation     | 101,2 | 210,4 | 218,7 | 94,81 | 58,79 | 242,5 | 235,6 | 59,84 | 272,7 | 58,51 | 222,9 | 58,56 | 260,8 | 22,01 |
|                 | Std. Error of Mean | 32    | 66,54 | 69,16 | 29,98 | 18,59 | 76,67 | 74,49 | 18,92 | 86,23 | 18,5  | 70,48 | 18,52 | 82,48 | 6,96  |
| omicron-HCW 3   | Number of values   | 15    | 15    | 15    | 15    | 15    | 15    | 15    | 15    | 15    | 15    | 15    | 15    | 15    | 15    |
|                 | Minimum            | 160   | 160   | 160   | 0,32  | 40    | 160   | 320   | 40    | 160   | 16    | 80    | 40    | 160   | 10    |
|                 | Maximum            | 640   | 640   | 640   | 640   | 640   | 640   | 640   | 640   | 640   | 640   | 640   | 640   | 640   | 160   |
|                 | Range              | 480   | 480   | 480   | 639,7 | 600   | 480   | 320   | 600   | 480   | 624   | 560   | 600   | 480   | 150   |
|                 | Mean               | 586,7 | 544   | 586,7 | 405,4 | 328   | 522,7 | 618,7 | 344   | 501,3 | 206,4 | 400   | 376   | 565,3 | 62,4  |
|                 | Std. Deviation     | 144   | 168,9 | 144   | 240,8 | 215   | 176   | 82,62 | 229,2 | 180,1 | 189,4 | 215,9 | 235,1 | 158,5 | 61,9  |
|                 | Std. Error of Mean | 37,17 | 43,61 | 37,17 | 62,19 | 55,51 | 45,43 | 21,33 | 59,18 | 46,49 | 48,89 | 55,75 | 60,7  | 40,92 | 15,98 |

Convalescent-PD: Covid-19 Convalescent Plasma Donors; naïve-HCW 2-1: Naive HealthCare Workers with 2 doses of BTN162b2 at 1-month follow-up; exposed-HCW 2-1: COVID-19 HealthCare Workers with 2 doses of BTN162b2 at 1-month follow-up; naïve-HCW 2-6: Naïve HealthCare Workers with 2 doses of BTN162b2 at 6-month follow-up; exposed-HCW 2-6: COVID-19 HealthCare Workers with 2 doses of BTN162b2 at 6-month follow-up; naïve-HCW 3-1: Naive HealthCare Workers with 3 doses of BTN162b2 at 1-month follow-up; exposed-HCW 3-1: COVID-19 HealthCare Workers with 3 doses of BTN162b2 at 1-month follow-up; omicron-HCW 3: Omicron HealthCare workers with 3 doses of BTN162b2 after omicron infection.
